# Supplementary material for: Climate change and conservation in a warm North American desert: effect in shrubby plants
Source: PeerJ journal article supplement (doi:10.7717/peerj.6572), 2019-03-07

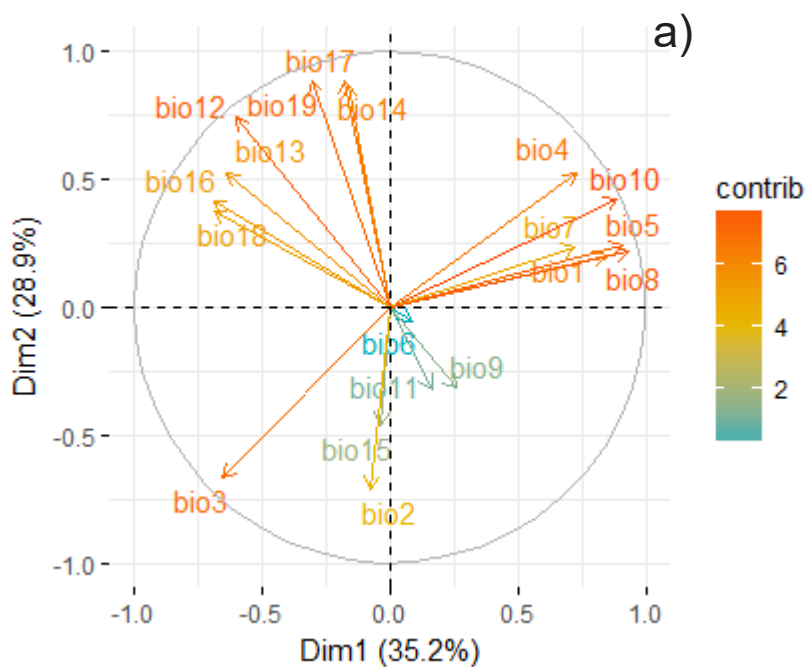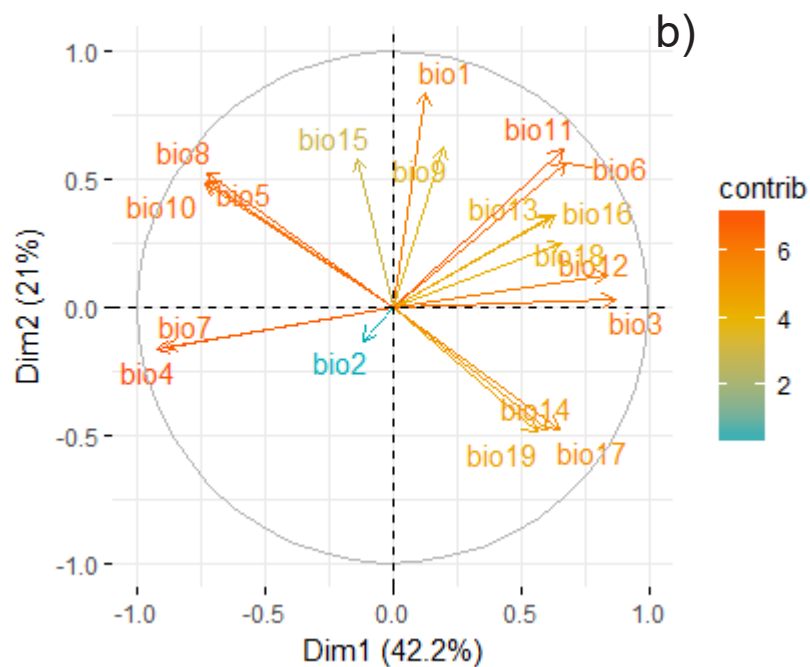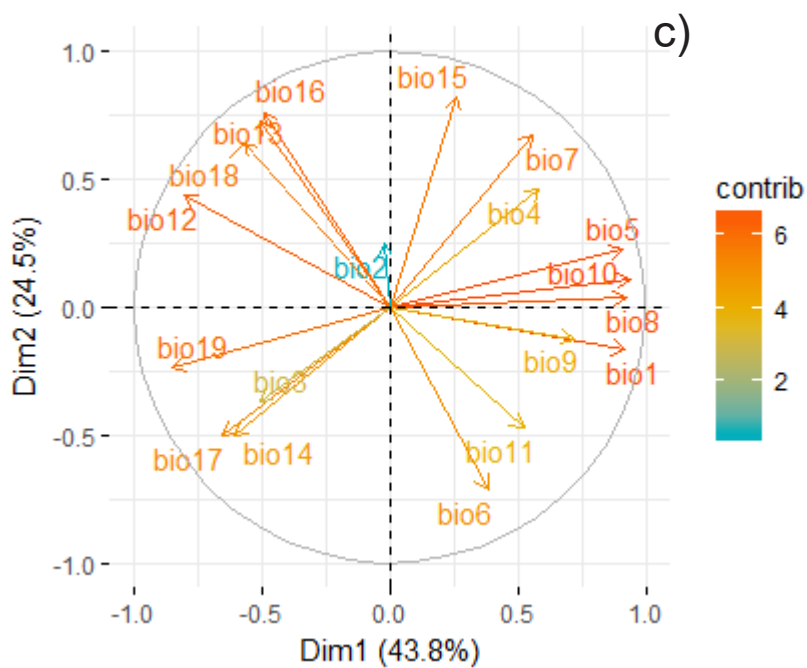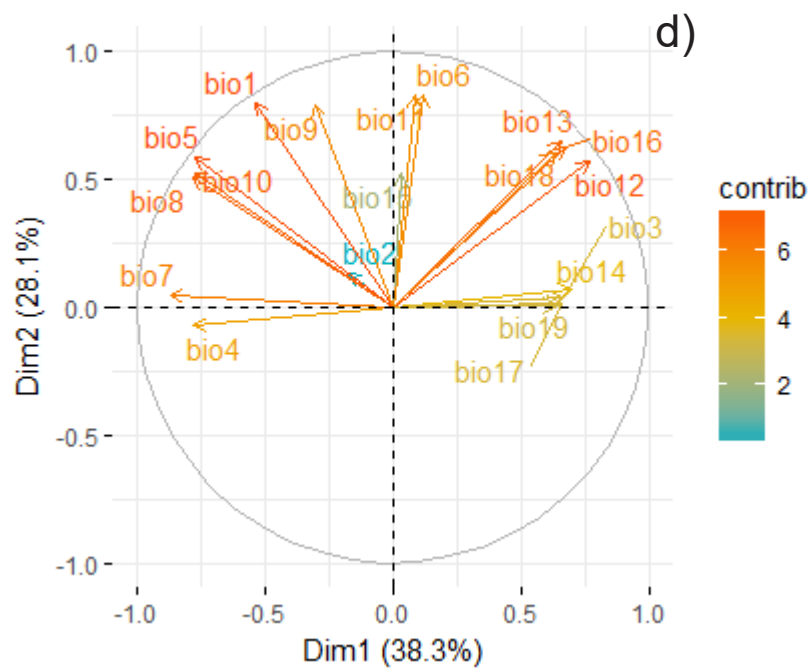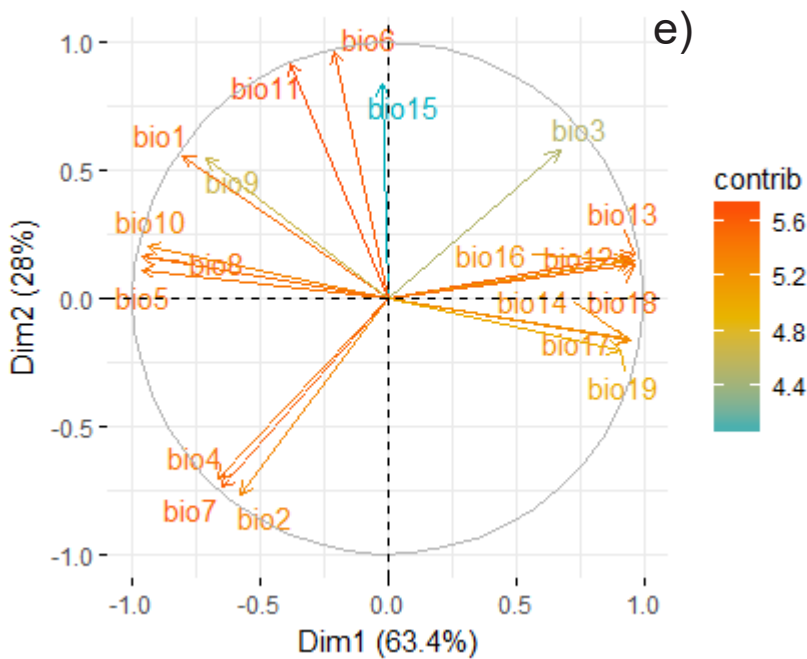

Supplement: FigureS1.pdf [file FigureS1.pdf]
